# Supplementary material for: Aromatic acids in a Eurasian Arctic ice core: a 3000-year proxy record of biomass burning
Source: Copernicus journal article supplement (doi:10.5194/cp-2016-126), 2016-12-15
Supplement: Supplementary file 1 [file cp-2016-126-supplement.pdf]

# Supplement for Aromatic acids in a Eurasian ice core: a 3,000-year proxy record of biomass burning

Mackenzie M. Grieman<sup>\*1</sup>, Murat Aydin<sup>1</sup>, Diedrich Fritzsche<sup>2</sup>, Joseph R. McConnell<sup>3</sup>, Thomas Opel<sup>2,4</sup>, Michael Sigl<sup>5</sup> and Eric S. Saltzman<sup>1</sup>

<sup>1</sup> Department of Earth System Science, University of California, Irvine, Irvine, California, 92697-3100, USA

<sup>2</sup> Alfred Wegener Institute Helmholtz Centre for Polar and Marine Research, Potsdam, Germany

<sup>3</sup> Division of Hydrologic Sciences, Desert Research Institute, Reno, Nevada, USA

<sup>4</sup> Permafrost Laboratory, Department of Geography, University of Sussex, Brighton, UK

<sup>5</sup> Laboratory of Environmental Chemistry, Paul Scherrer Institut, Villigen, Switzerland

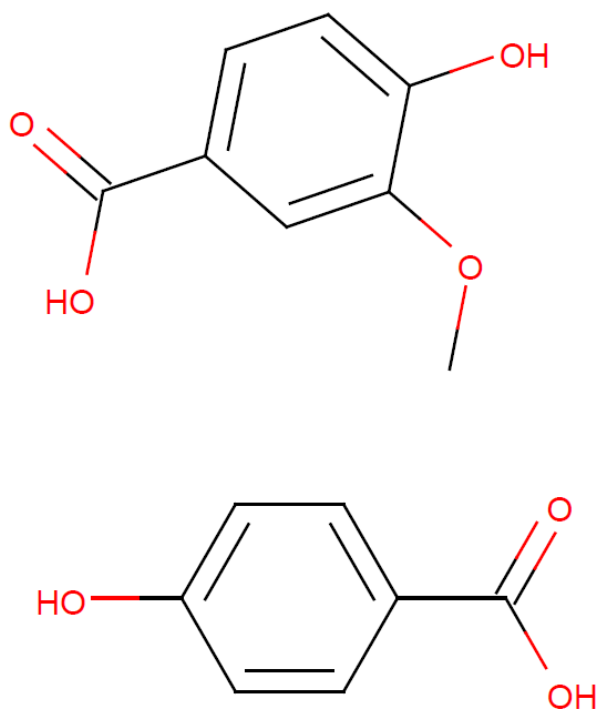

**Figure S1:** Molecular structures of vanillic acid (C<sub>8</sub>H<sub>8</sub>O<sub>4</sub>; top) and para-hydroxybenzoic acid (C<sub>7</sub>H<sub>6</sub>O<sub>3</sub>; bottom).

---

\*correspondence to: mgrieman@uci.edu

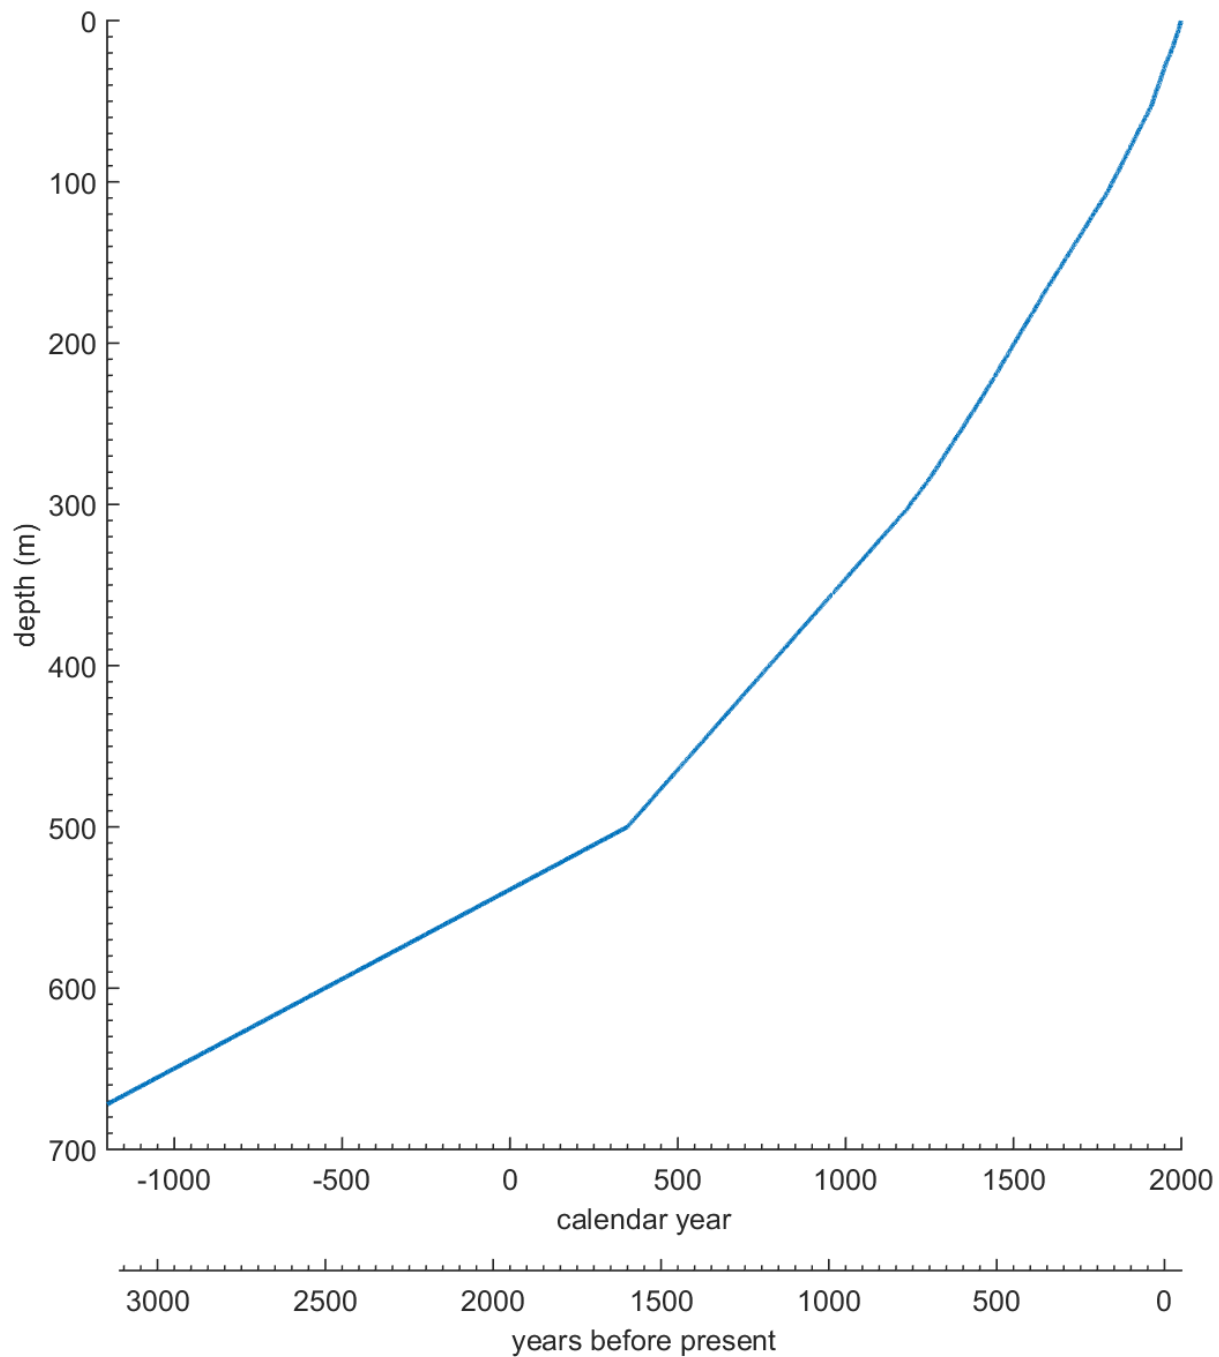

**Figure S2:** Akademii Nauk ice core depth-age scale. This age scale was determined using correlation between high resolution multi-element continuous flow analysis on this and other Arctic ice cores (Sigl et al., 2013). We note that this timescale yields a record that is longer than was predicted by an earlier published timescale based on volcanic sulphate signals and annual layer counting of stable water isotopes (Opel et al., 2013).

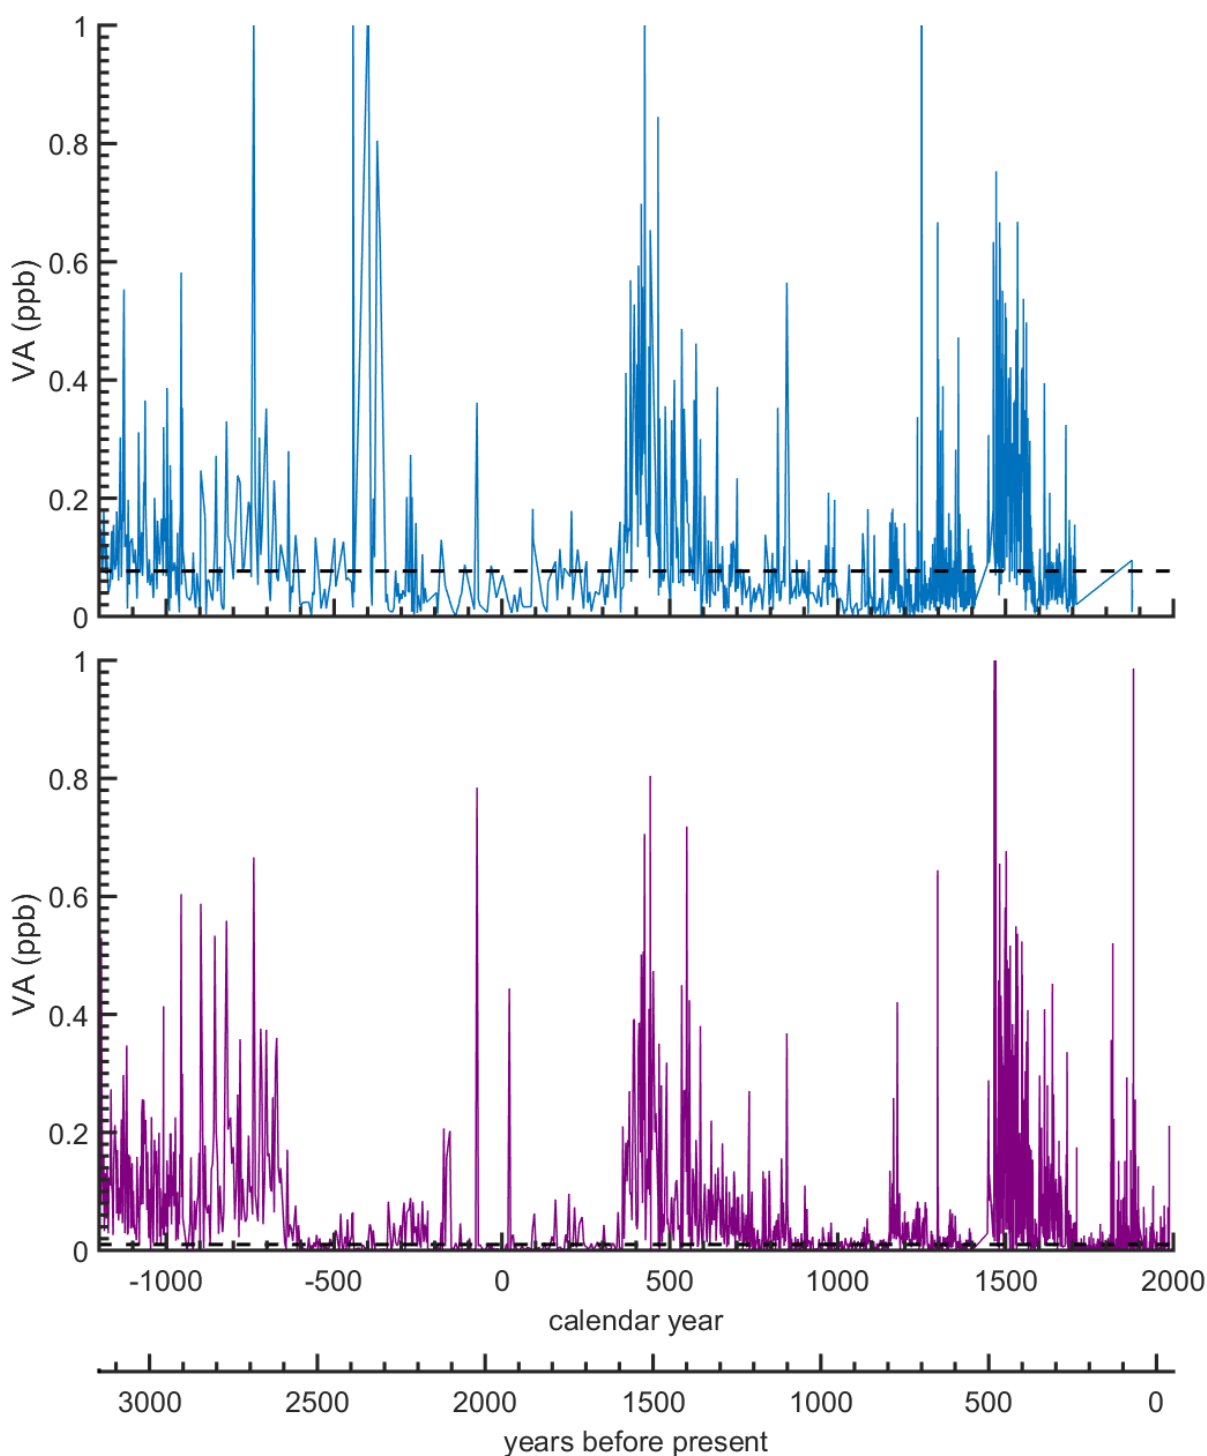

**Figure S3:** Akademii Nauk vanillic acid ice core measurements using two different analytical techniques. Top – High performance liquid chromatography with electrospray ionization and tandem mass spectrometry (HPLC-ESI/MS/MS); Bottom – Ion chromatography with electrospray ionization and tandem mass spectrometry (IC-ESI/MS/MS). Dotted horizontal lines are the limits of detection. Similar results were obtained by both techniques. IC-ESI/MS/MS has a significantly lower detection limit and improved quantitation over HPLC-ESI/MS/MS.

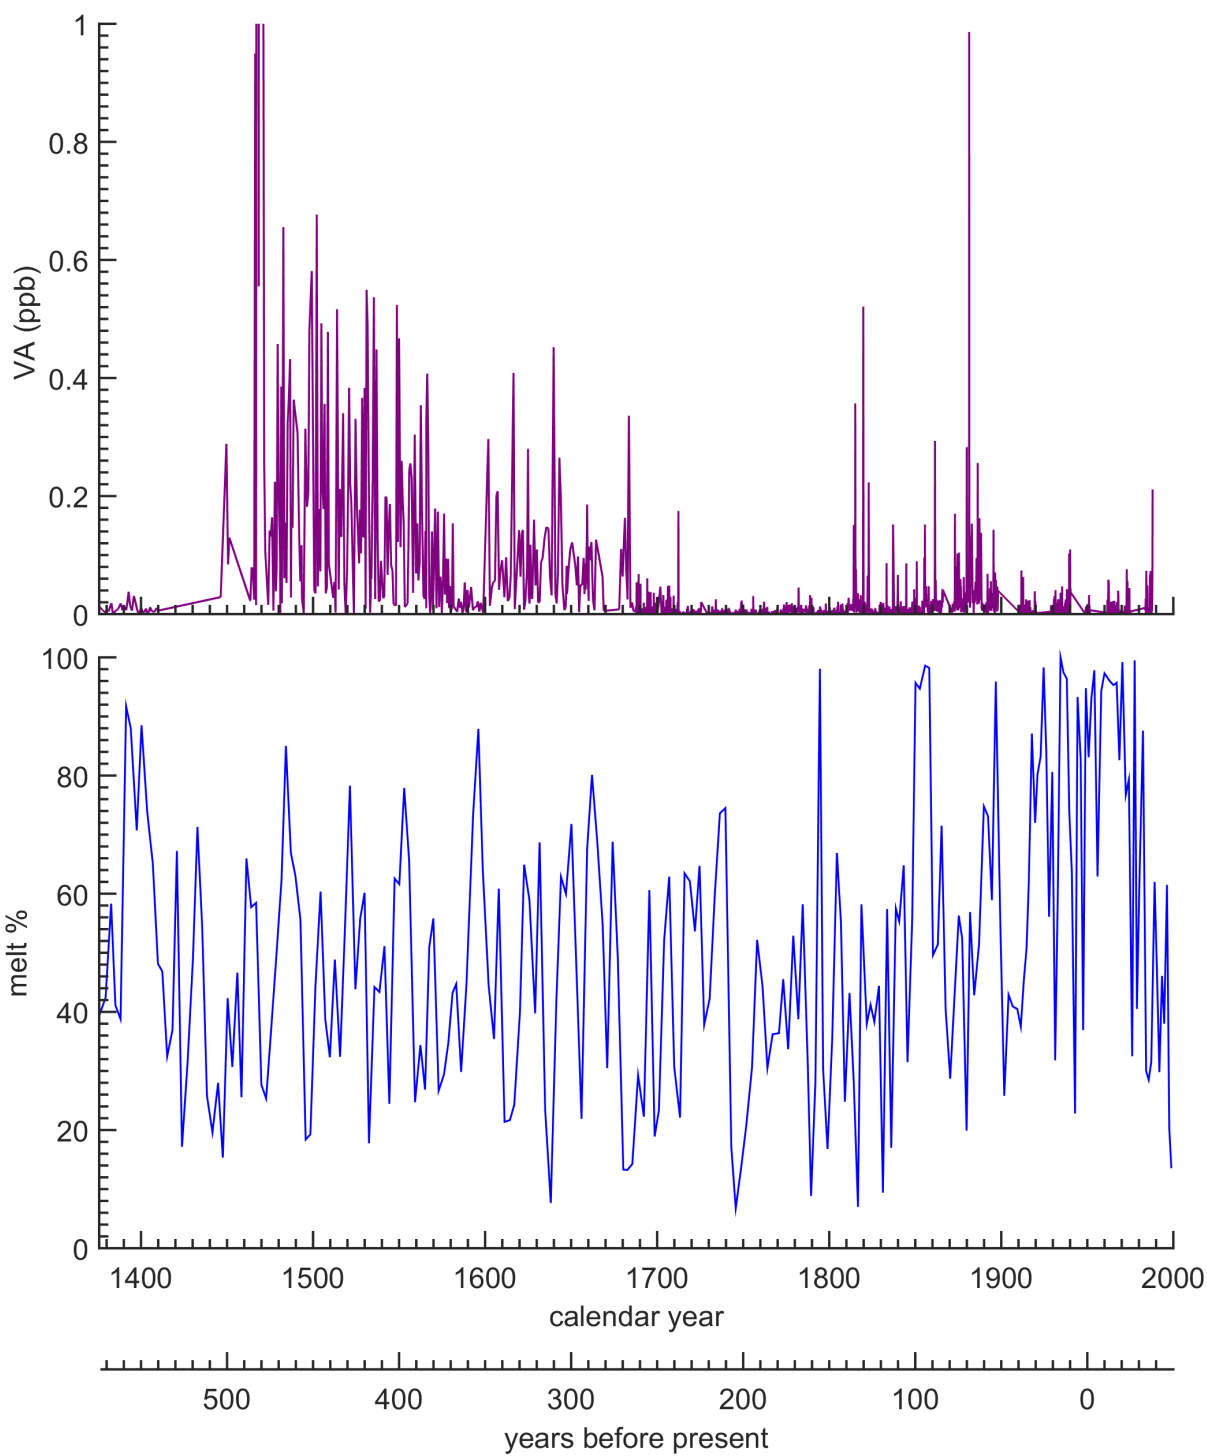

**Figure S4:** Akademii Nauk vanillic acid (top) and the distribution of melt layers in the ice core (bottom).

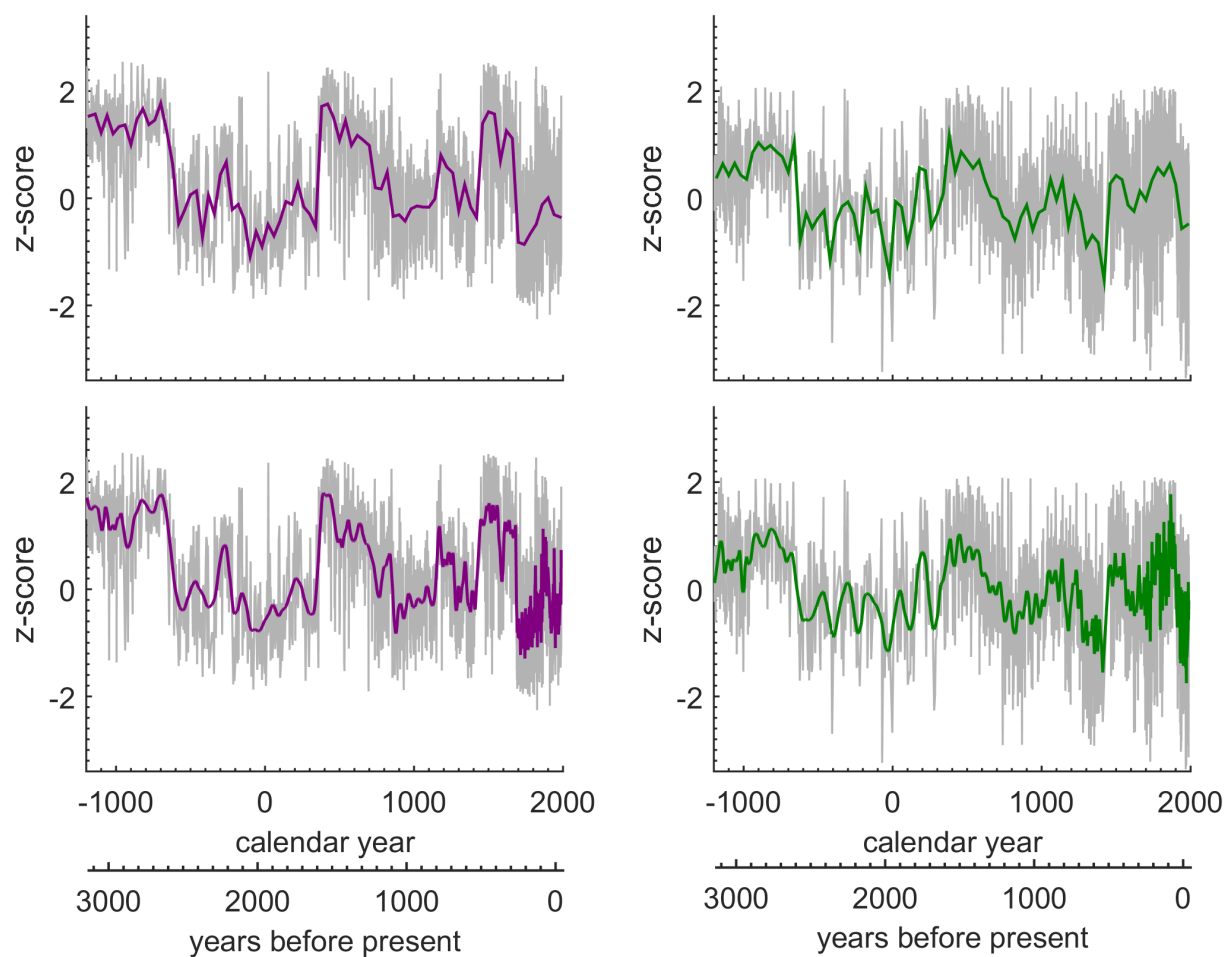

**Figure S5:** Akademii Nauk vanillic acid (left) and para-hydroxybenzoic acid (right) using 40-year bin averaging (top) and LOESS smoothing (span = 0.013) (bottom). Outliers were omitted prior to analyses. Data were normalized using the log transformation, mini-max transformation, and the z-score (grey lines).

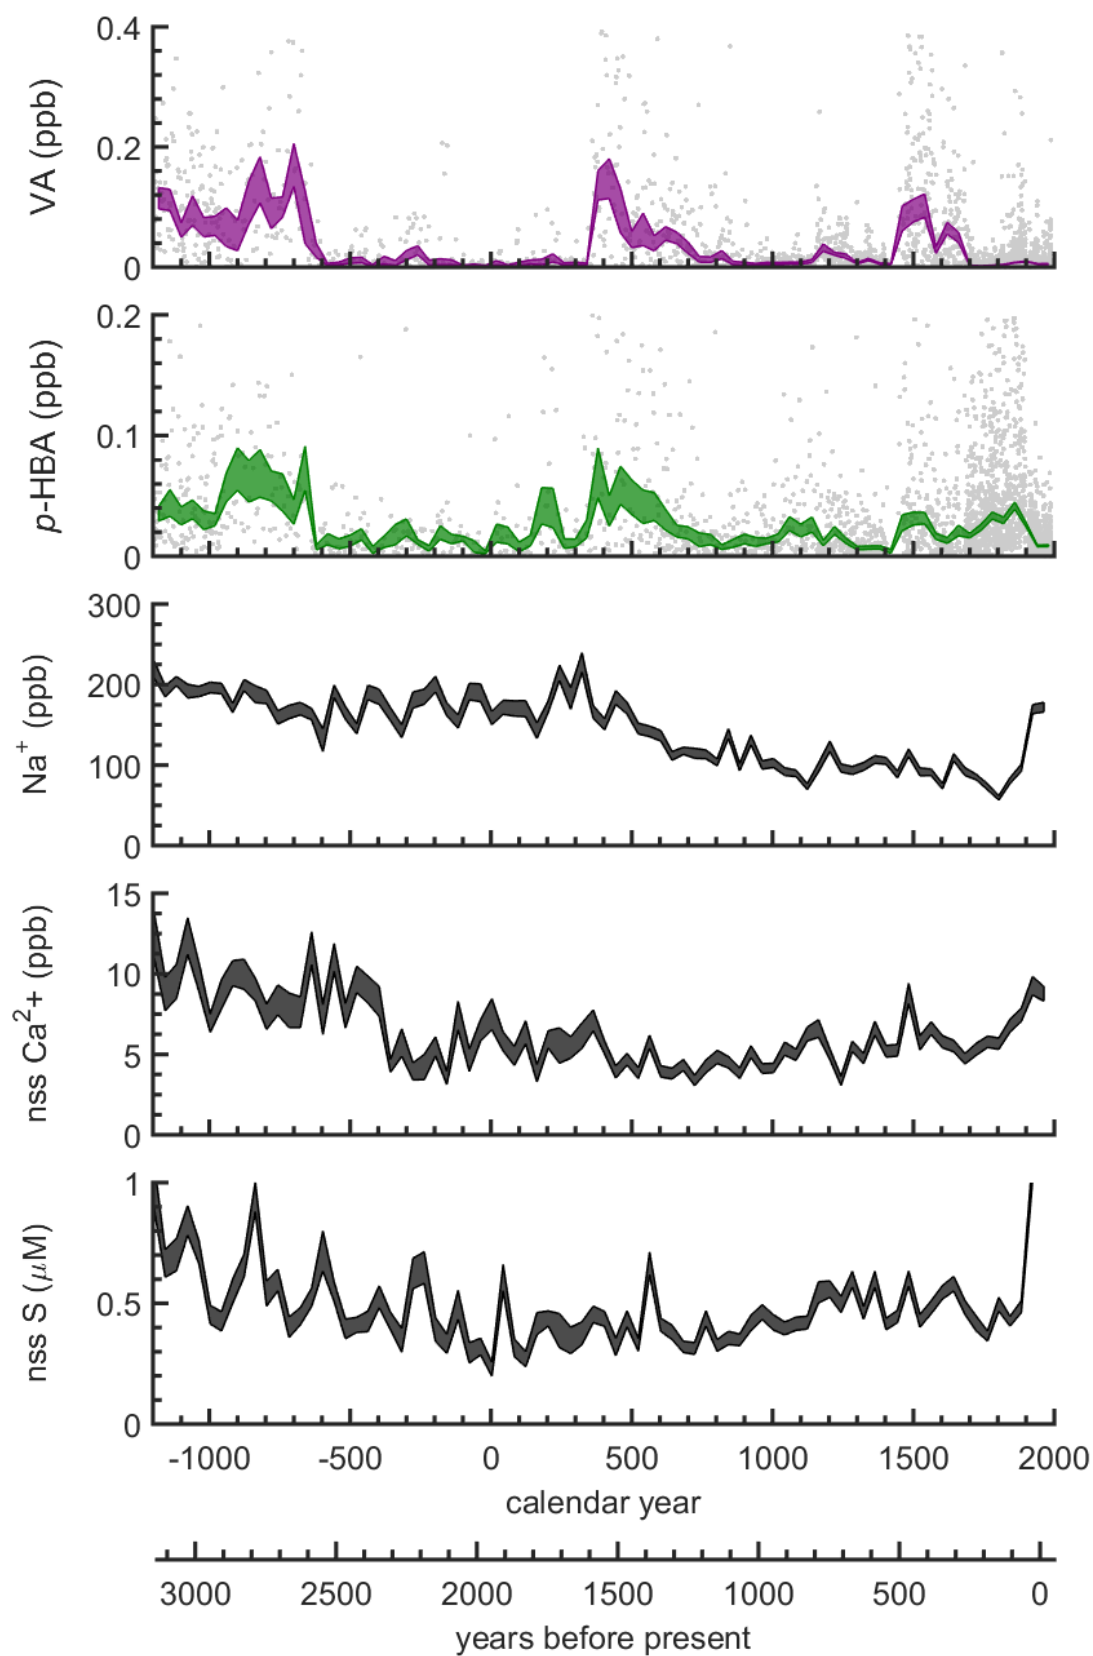

**Figure S6:** Akademii Nauk ice core chemistry over the past 3,000 years. Data are 40-year bin-averaged (fills are  $\pm 1$  standard error of log transform) measurements. From top: 1) VA measurements, 2) p-HBA measurements, 3) sodium, 4) non-sea salt calcium, and 5) non-sea salt sulphur.

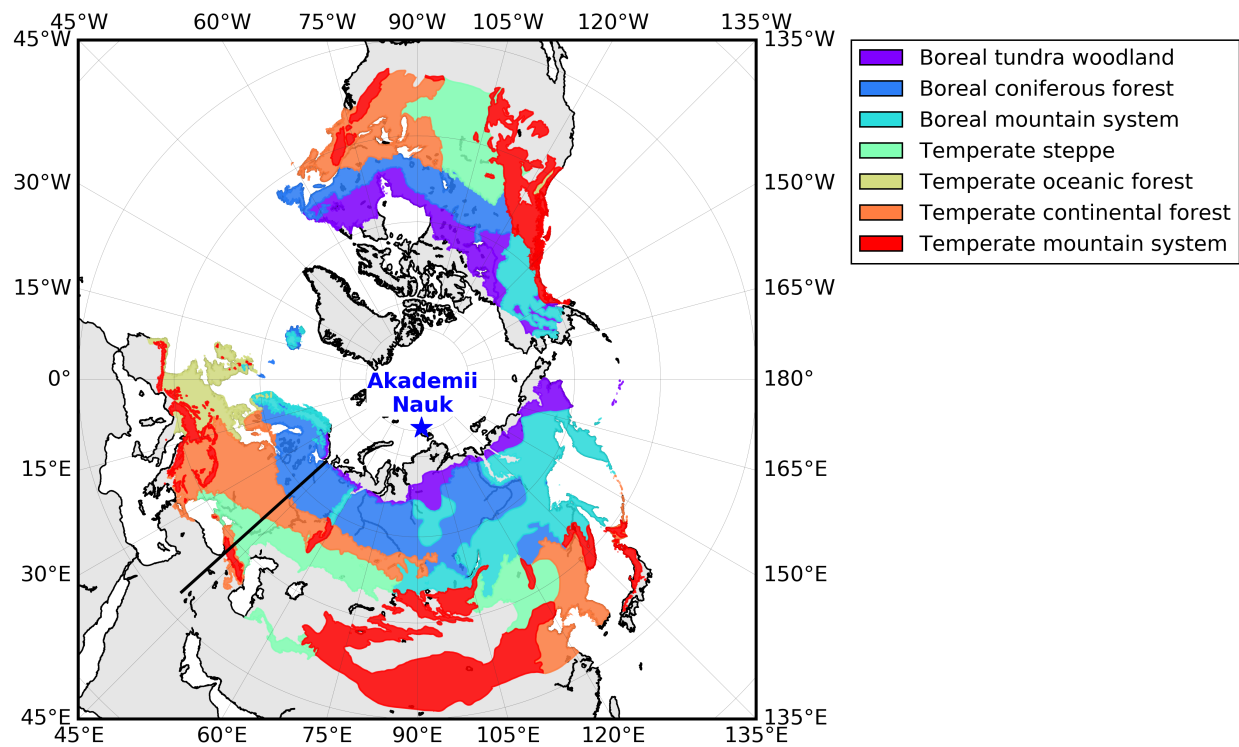

**Figure S7:** Map of ecofloristic zones defined by the Food and Agriculture Organization (Ruesch and Gibbs, 2008). The black line defines the boundary (42°E) between Siberia and Europe used for HYSPLIT trajectory analysis.

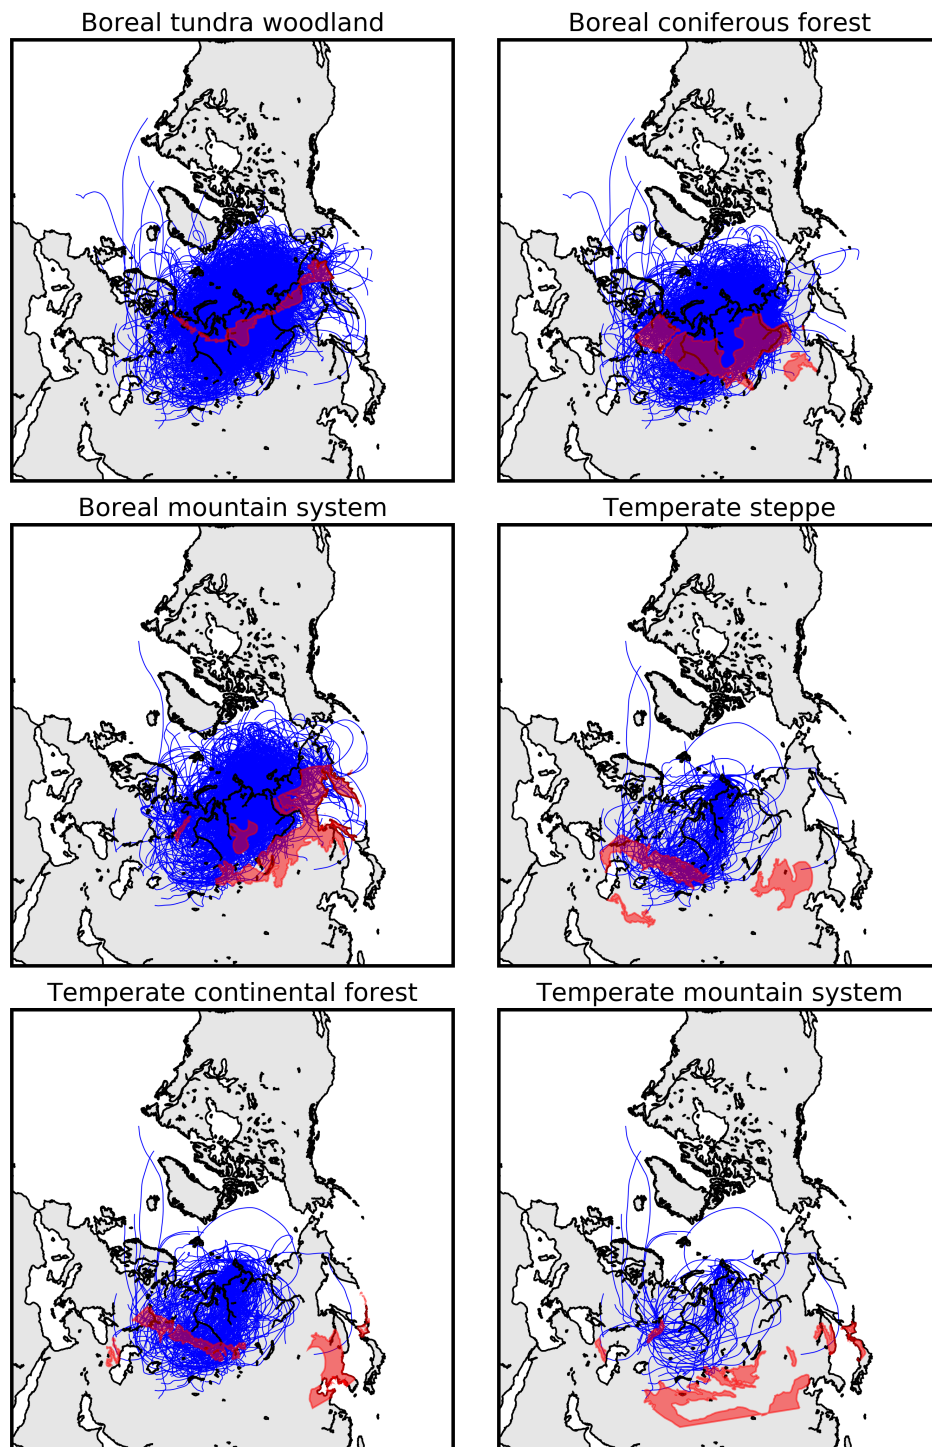

**Figure S8:** Maps of 10-day air mass back-trajectories using the HYSPLIT model from the Akademii Nauk ice core site. All back trajectories start at 12:00 AM and 12:00 PM from 100 m above ground level for the years 2006-2015 CE. Blue lines are trajectories from spring, summer, and fall (March 1-November 30) that transect or originate from each of the Siberian ecofloristic zones. Siberia is defined as landmass east of 42°E. The ecofloristic zones (red) are defined by the Food and Agriculture Organization (Ruesch and Gibbs, 2008). Left panel from top: 1) Boreal tundra woodland, 2) Boreal mountain system, and 3) Temperate continental forest. Right panel from top: 1) Boreal coniferous forest, 2) Temperate steppe, and 3) Temperate mountain system.



## References

- Opel, T., Fritzsche, D., and Meyer, H.: Eurasian Arctic climate over the past millennium as recorded in the Akademii Nauk ice core (Severnaya Zemlya), *Clim. Past*, 9, 2379–2389, doi:10.5194/cp-9-2379-2013, cP, 2013.
- Ruesch, A. and Gibbs, H. K.: New IPCC Tier-1 global biomass carbon map for the year 2000, 2008.
- Sigl, M., McConnell, J. R., Layman, L., Maselli, O., McGwire, K., Pasteris, D., Dahl-Jensen, D., Steffensen, J. P., Vinther, B., Edwards, R., Mulvaney, R., and Kipfstuhl, S.: A new bipolar ice core record of volcanism from WAIS Divide and NEEM and implications for climate forcing of the last 2000 years, *Journal of Geophysical Research: Atmospheres*, 118, 1151–1169, doi:10.1029/2012JD018603, 2013.
